# Supplementary material for: Exploring the phenotypic and molecular diversity of Calendula officinalis L. cultivars featuring varying flower types
Source: PeerJ. 2025 Jan 6;13:e18814. doi: 10.7717/peerj.18814 (PMC11716024; doi:10.7717/peerj.18814)
Supplement: Data S1 [file peerj-13-18814-s001.xlsx]

## Sheet: SCoT
PM1	0	1	0	1	1	1	0	1	1	0	1	1	1	1	1	0	1	1	1	1	1	0	1	1	1	0	0	0	1	1	0	0	0	0	0	0	1	1	1	1	1	1	1	1	1	1	1	0	1
PM2	0	1	0	1	1	0	0	1	1	0	1	1	0	1	1	1	1	0	1	1	1	0	1	1	1	0	1	0	1	1	1	0	0	1	1	0	1	0	1	1	1	1	1	1	1	1	1	0	1
PM3	0	1	0	1	1	0	0	1	1	0	1	1	1	1	1	1	0	0	1	1	0	0	1	1	1	0	1	0	1	1	1	0	0	1	0	0	1	0	1	1	1	1	1	1	1	1	1	0	1
PM4	0	0	0	0	1	1	0	0	1	0	1	0	0	1	1	1	1	0	1	1	1	0	1	1	1	0	1	0	1	0	1	0	0	1	0	0	1	0	1	1	1	1	1	1	1	0	1	0	1
PM5	0	0	0	0	1	1	0	0	1	0	1	0	0	0	1	1	1	0	0	1	1	0	1	0	1	0	1	0	1	0	1	0	1	1	0	0	1	0	1	1	1	1	1	1	1	0	1	0	1
PM6	0	1	1	1	1	1	0	1	0	0	1	0	1	1	1	1	0	1	1	1	1	0	1	1	1	0	0	0	1	0	1	0	0	0	0	0	1	0	1	1	1	1	1	1	1	1	1	0	1
PM7	0	1	0	1	1	1	0	1	1	0	1	1	0	1	1	1	1	1	1	1	1	0	1	1	1	0	1	0	1	1	1	0	0	0	1	0	1	0	1	1	1	1	1	1	1	1	1	0	1
PM8	0	1	1	1	1	1	0	1	1	0	1	1	0	0	1	1	1	0	1	1	0	0	1	0	0	0	0	1	1	1	1	0	0	0	1	0	1	0	1	1	1	1	1	1	1	1	1	0	1
PM9	0	0	0	1	0	1	0	0	1	0	1	0	0	1	1	1	1	1	1	1	1	0	1	0	1	0	1	0	1	0	1	0	0	1	1	0	1	0	1	1	1	1	1	1	1	0	1	1	1
PM10	0	1	0	1	1	0	1	1	1	0	1	1	0	0	1	1	1	0	1	1	1	0	1	1	0	0	1	0	1	1	1	0	0	0	1	0	1	0	1	1	1	1	1	1	1	1	1	1	1
PM11	0	1	0	1	1	1	0	1	0	1	1	1	0	0	1	1	1	1	1	1	1	0	1	0	1	1	1	0	1	1	1	0	0	0	0	0	1	0	1	1	1	1	1	1	1	1	1	1	1
PM12	0	1	0	0	1	0	0	0	0	1	1	1	0	1	1	1	1	0	0	1	1	0	1	1	1	1	1	0	1	1	1	0	0	0	0	1	1	0	1	1	1	1	1	1	1	1	1	0	1
PM13	0	1	0	0	1	0	0	0	0	0	1	0	0	1	1	1	1	0	0	1	1	0	1	1	1	1	1	0	1	1	1	0	0	0	0	1	1	0	1	1	1	1	1	1	1	1	1	0	1
PM14	0	1	0	1	1	1	0	0	1	0	1	1	0	0	1	1	1	0	1	1	1	0	1	1	0	1	0	0	1	1	1	0	0	0	0	0	1	0	1	1	1	1	1	1	1	1	1	0	1
PM15	0	0	0	1	1	1	0	0	1	0	1	0	0	1	1	1	1	0	0	1	1	0	1	1	1	1	1	0	1	0	1	0	0	1	1	0	1	0	1	1	1	1	1	1	1	0	1	0	1
PM16	0	0	0	1	0	1	0	0	1	0	1	0	0	1	1	1	1	0	0	1	1	1	1	1	1	1	1	0	1	0	1	1	0	1	0	0	1	0	1	1	1	1	1	1	1	0	1	0	1
PM17	0	1	0	1	1	1	0	1	1	0	1	0	1	1	1	1	1	0	1	1	1	1	1	1	0	1	0	1	1	1	1	0	0	0	0	0	1	0	1	1	1	1	1	1	1	1	1	0	1
PM18	0	1	0	0	1	0	0	0	0	1	1	0	0	1	1	1	1	0	0	1	1	0	1	1	1	1	1	0	1	1	1	0	0	0	0	1	1	0	1	1	1	1	1	1	1	1	1	0	1
PM19	0	0	0	0	1	1	0	0	1	1	1	0	0	0	1	1	1	1	1	1	1	0	1	1	1	0	1	0	1	1	1	0	0	1	0	0	1	0	1	1	1	1	1	1	1	0	1	0	1
PM20	0	1	0	1	1	1	0	0	1	0	1	1	0	0	1	1	1	0	1	1	1	0	1	0	0	1	0	0	1	1	1	0	0	0	0	0	1	0	1	1	1	1	1	1	1	1	1	0	1
[truncated: 51 more columns]

## Sheet: morphology
Cultivar	Code	Plant height (cm)	No. of inflorescences per plant	Diameter of inflorescences (mm)	No. of rows petals	Petal length (mm)	Share of petal flowers (%)
Orange Gem	PM 1	47.7	17.7	55.1	7	40.2	56.3
Deja Vu	PM 2	51.3	29.6	47.1	5	34.4	48.8
Indian Prince	PM 3	62.6	39.3	65.5	8	54.6	55.3
Apricot Beauty	PM 4	73.5	44.2	59	9	42.5	52.6
Pink Surprise	PM 5	53.5	24.8	44.4	6	27	50.6
Cream Beauty	PM 6	66	40.3	55.6	5	41.4	51.3
Apricot Twist	PM 7	35.2	28.6	47.8	5	34.1	51.4
Bon Bon Orange	PM 8	42	30	45.8	3	32.6	44.4
Lemon Gem	PM 9	46	24.3	52.1	5	42	57.8
Greenheart Orange	PM 10	72.4	33.4	63.9	7	49.7	50.4
Orange Fire	PM 11	64.7	36.7	55.7	4	39.3	45.9
Geisha Girl	PM 12	44.7	34.8	49.7	9	34.7	57.5
Flame Dancer	PM 13	67.6	39	51.1	8	36.1	54.5
Helios	PM 14	67.7	39.2	66	9	51.5	61.1
Jowisz	PM 15	61.3	37.9	65.3	7	51.7	62
Neptun	PM 16	49.3	38	49.9	6	38.3	63.3
Orange King	PM 17	61.6	45.2	69.1	8	53.6	63.6
Sunset Buff	PM18	59.2	30.1	51.2	5	35.2	55
Santana	PM 19	64.5	34.4	64.9	6	51.6	62.7
Promyk	PM 20	40.2	25.5	48.4	7	38.2	61.2
